# Supplementary material for: Metabolomics Analysis Reveals Molecular Signatures of Metabolic Complexity in Children with Hypercholesterolemia
Source: MDPI journal article supplement (doi:10.3390/nu15071726), 2023-03-31
Supplement: s1 [file s1]

## Supplementary Figures and Tables

**TABLE S1** PLS-DA parameters and permutation test for distinguishing between children with different status of cholesterol level.

| Cholesterol level status  | PLS-DA parameters |       |       |           | $P_{\text{permutation}}^{\dagger}$ |
|---------------------------|-------------------|-------|-------|-----------|------------------------------------|
|                           | Components*       | $Q^2$ | $R^2$ | $Q^2/R^2$ |                                    |
| High vs. Acceptable       | 1                 | -0.05 | 0.19  | -0.25     | 0.161                              |
| Borderline vs. Acceptable | 3                 | -0.61 | 0.28  | -1.54     | 0.170                              |
| High vs. Borderline       | 1                 | 0.00  | 0.13  | 0.01      | 0.378                              |

PLS-DA, partial least squares-discriminant analysis;  $Q^2$ , predictive capability;  $R^2$ , correlation coefficients. \*The number of components based on  $Q^2$  indicates the best classifier of PLS-DA using a 10-fold cross-validation method.  $\dagger$ 1000 random permutations were performed.

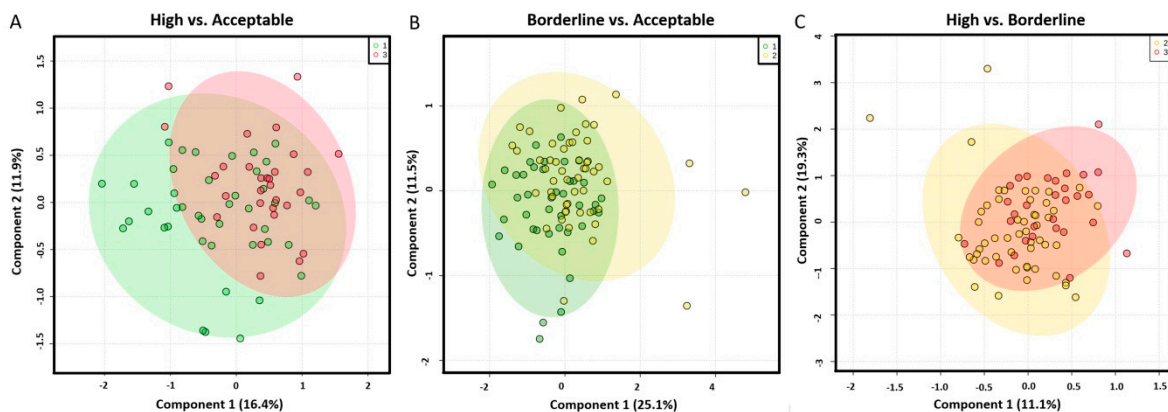

**Figure S1** PLS-DA score plots from the analysis of plasma  $^1\text{H}$ -NMR spectra between high and acceptable levels of cholesterol (A), and between borderline and acceptable levels of cholesterol (B), and between high and borderline levels of cholesterol (C). 1, acceptable cholesterol level; 2, borderline cholesterol level; 3, high cholesterol level; x axis, component 1 (% of total variance); y axis, component 2 (% of total variance).
